# Supplementary material for: Differential clinical impact of chronic total occlusion revascularization based on left ventricular systolic function
Source: Springer Nature journal article supplement (doi:10.1007/s00392-020-01738-2), 2020-09-02
Supplement: MOESM1 [file 18341822]

# Differential clinical impact of chronic total occlusion revascularization based on left ventricular systolic function

## Clinical Research in Cardiology

Hyungdon Kook, MD<sup>a\*</sup>; Jeong Hoon Yang, MD<sup>b\*</sup>; Jae Young Cho, MD<sup>c</sup>; Duck Hyun Jang, MD<sup>a</sup>; Min Sun Kim, MS<sup>d</sup>; Juneyoung Lee, PhD<sup>d</sup>; Seung Hun Lee, MD<sup>e</sup>; Hyung Joon Joo, MD<sup>a</sup>; Jae Hyoung Park, MD<sup>a</sup>; Soon Jun Hong, MD<sup>a</sup>; Je Sang Kim, MD<sup>e</sup>; Hyun Jong Lee, MD<sup>e</sup>; Rak Kyeong Choi, MD<sup>e</sup>; Young Jin Choi, MD<sup>e</sup>; Jin Sik Park, MD<sup>e</sup>; Young Bin Song, MD<sup>b</sup>; Jin-Ho Choi, MD<sup>b</sup>; Joo-Yong Hahn, MD<sup>b</sup>; Hyeon-Cheol Gwon, MD<sup>b</sup>; Do-Sun Lim, MD<sup>a</sup>; Seung-Hyuk Choi, MD<sup>b</sup>; Cheol Woong Yu, MD<sup>a</sup>

\*The first two authors contributed equally to this article.

The last two authors are co-corresponding authors.

<sup>a</sup>Division of Cardiology, Department of Internal Medicine, Korea University Anam Hospital, Korea University College of Medicine, Seoul, Korea; <sup>b</sup>Division of Cardiology, Department of Internal Medicine, Samsung Medical Center, Sungkyunkwan University College of Medicine, Seoul, Korea; <sup>c</sup>Department of Cardiovascular Medicine, Regional Cardiocerebrovascular Center, Wonkwang University Hospital, Iksan, Korea; <sup>d</sup>Department of Biostatistics, Korea University College of Medicine, Seoul, Korea; <sup>e</sup>Division of Cardiology, Department of Internal Medicine, Sejong General Hospital, Bucheon, Korea

**Address for correspondence:**

Cheol Woong Yu, MD, PhD

Cardiovascular Center, Anam Hospital, Korea University Medical Center,

#73, Goryeodae-ro, Sungbuk-ku, Seoul, 02841, Korea

E-mail: [ycw717@naver.com](mailto:ycw717@naver.com)

Seung-Hyuk Choi, MD, PhD

Division of Cardiology, Department of Medicine, Samsung Medical Center, Sungkyunkwan University School of Medicine, Seoul, Korea

#81, Irwon-ro, Gangnam-gu, Seoul. 06351, Korea

E-mail: [cardiochoi@skku.edu](mailto:cardiochoi@skku.edu)

**Electronic Supplementary Material**

**Online Resource 1.** IPTW adjusted Baseline clinical characteristics of the study population

|                   | PLVSF group  |              |         | RLVSF group  |              |         |
|-------------------|--------------|--------------|---------|--------------|--------------|---------|
|                   | SCR          | OMT          | P value | SCR          | OMT          | P value |
| Age (yr)          | 63.22 ±13.73 | 63.09 ±17.53 | 0.8297  | 65.68 ±14.34 | 64.03 ±19.70 | 0.2021  |
| EF (%)            | 61 ±7.94     | 60.97 ±12.24 | 0.9316  | 37.3 ±10.21  | 37.81 ±13.72 | 0.578   |
| Male gender       | 927 (76.99)  | 997 (87.12)  | 0.4983  | 258 (80.58)  | 311 (82.45)  | 0.5257  |
| Hypertension      | 783 (65.02)  | 826 (64.76)  | 0.8919  | 222 (69.21)  | 237 (62.91)  | 0.0803  |
| Diabetes mellitus | 481 (39.94)  | 507 (39.76)  | 0.9301  | 183 (57.11)  | 224 (59.51)  | 0.5227  |
| Dyslipidemia      | 341 (28.33)  | 369 (28.90)  | 0.7516  | 77 (24.05)   | 97 (25.85)   | 0.5834  |
| Smoking           | 353 (29.35)  | 309 (24.18)  | 0.0036  | 116 (36.26)  | 173 (45.99)  | 0.0094  |
| Previous CKD      | 81.35 (6.76) | 106 (8.28)   | 0.1514  | 41 (12.70)   | 52 (13.92)   | 0.6369  |
| Previous stroke   | 80 (6.67)    | 94 (7.34)    | 0.5145  | 50 (15.74)   | 35 (9.38)    | 0.0109  |
| Previous MI       | 201 (16.69)  | 225 (17.60)  | 0.5476  | 157 (48.92)  | 235 (62.41)  | 0.0003  |
| Previous PCI      | 310 (25.78)  | 311 (24.37)  | 0.4179  | 108 (33.70)  | 115 (41.15)  | 0.0431  |

|     |             |             |        |            |             |        |
|-----|-------------|-------------|--------|------------|-------------|--------|
| ACS | 225 (18.69) | 246 (19.31) | 0.6974 | 93 (29.09) | 130 (34.57) | 0.1223 |
|-----|-------------|-------------|--------|------------|-------------|--------|

---

Data are mean  $\pm$  standard deviation or number (%). ACS=acute coronary syndrome; CKD=chronic kidney disease; EF=ejection fraction; IPTW=inverse probability of treatment weighting; MI=myocardial infarction; OMT=optimal medical therapy; PCI=percutaneous coronary intervention; PLVSF=preserved left ventricular systolic function; RLVSF=reduced left ventricular systolic function; SCR=successful chronic total occlusion revascularization.

**Online Resource 2.** Multivariate Cox Regression Analysis for Independent Predictor of Primary Endpoint in Overall CTO Patients

|                | Overall |        |       | PLVSF group |        |       | RLVSF group |        |       |
|----------------|---------|--------|-------|-------------|--------|-------|-------------|--------|-------|
|                | HR      | 95% CI |       | HR          | 95% CI |       | HR          | 95% CI |       |
| RLVSF          | 3.285   | 2.753  | 3.919 | NA          | NA     | NA    | NA          | NA     | NA    |
| SCR            | 0.579   | 0.486  | 0.691 | 0.64        | 0.5    | 0.819 | 0.455       | 0.349  | 0.594 |
| Sex            | 0.871   | 0.704  | 1.078 | 0.936       | 0.702  | 1.248 | 0.851       | 0.603  | 1.2   |
| Age (per year) | 1.053   | 1.044  | 1.063 | 1.072       | 1.057  | 1.088 | 1.041       | 1.028  | 1.054 |
| Smoking        | 1.534   | 1.252  | 1.879 | 0.768       | 0.555  | 1.062 | 2.554       | 1.886  | 3.459 |
| DM             | 1.428   | 1.194  | 1.707 | 1.677       | 1.312  | 2.144 | 1.085       | 0.827  | 1.424 |
| Hypertension   | 0.708   | 0.586  | 0.855 | 0.604       | 0.456  | 0.799 | 0.737       | 0.557  | 0.975 |
| Dyslipidemia   | 0.635   | 0.512  | 0.787 | 0.284       | 0.193  | 0.418 | 1.209       | 0.908  | 1.609 |
| CKD            | 3.824   | 3.029  | 4.826 | 4.345       | 3.061  | 6.168 | 3.426       | 2.457  | 4.777 |
| CTO lesion     |         |        |       |             |        |       |             |        |       |
| LAD            | 1.09    | 0.89   | 1.334 | 1.267       | 0.96   | 1.672 | 1.1         | 0.811  | 1.493 |
| LCX            | 1.387   | 1.138  | 1.69  | 1.568       | 1.203  | 2.045 | 1.621       | 1.177  | 2.231 |
| RCA            | 1.04    | 0.852  | 1.27  | 1.369       | 1.026  | 1.825 | 0.899       | 0.667  | 1.212 |

CI=confidence interval; CKD=chronic kidney disease; CTO=chronic total occlusion; DM=diabetes mellitus; HR=hazard ratio; LAD=left anterior descending; LCX=left circumflex; PLVSF=preserved left ventricular systolic function; RCA=right coronary artery; RLVSF=reduced left ventricular systolic function; SCR=successful CTO revascularization.

**Online Resource 3.** Comparison of primary endpoint according to the coronary anatomical location of CTO lesions of SCR patients

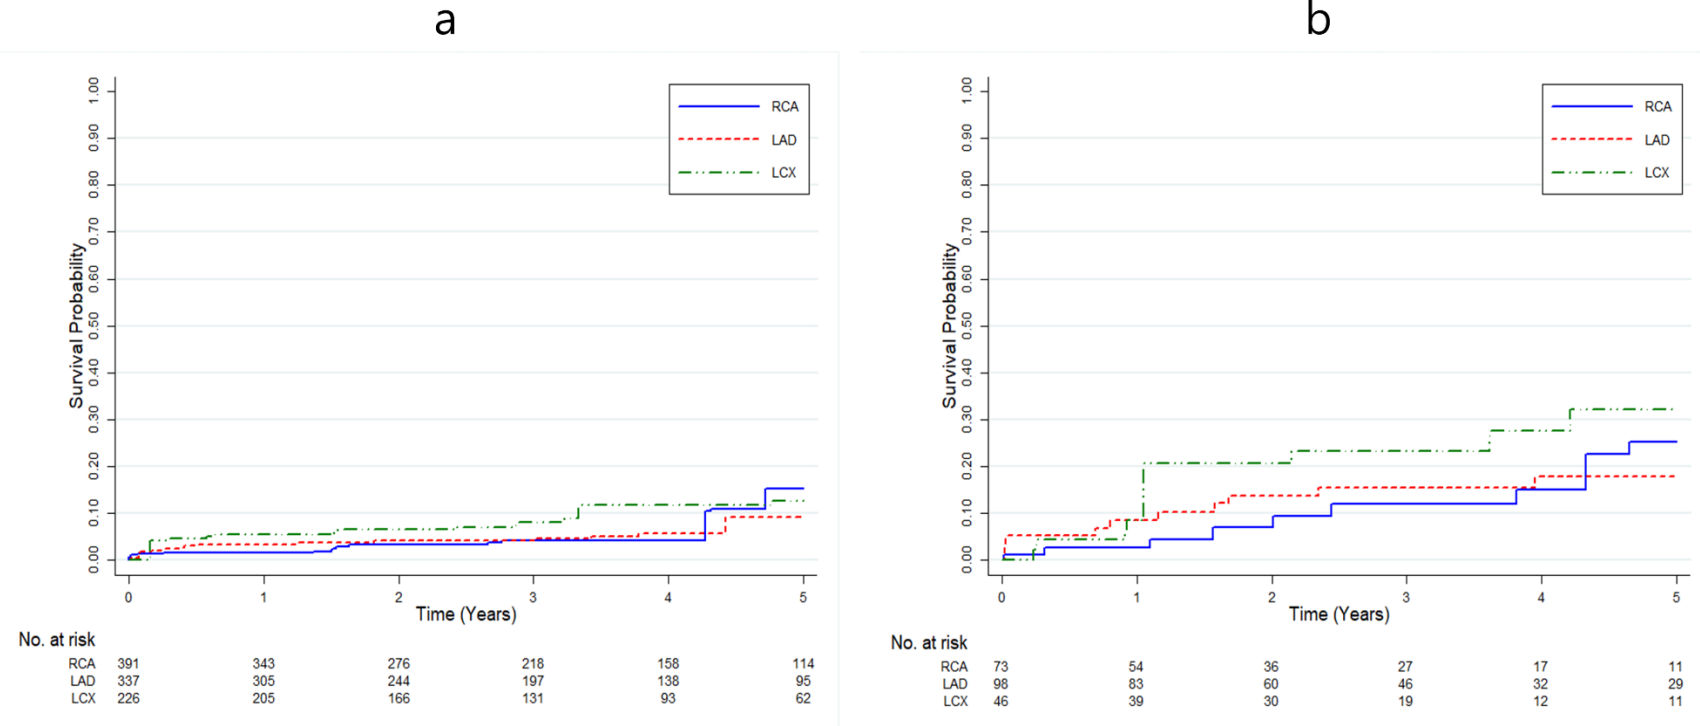

Panel a represents comparison according to the coronary anatomical location of CTO lesions of SCR patients in the PVLSF group. Panel b

represents comparison according to the coronary anatomical location of CTO lesions of SCR patients in the RVLSF group. CTO=chronic total occlusion; LAD=left anterior descending; LCX=left circumflex; PLVSF=preserved left ventricular systolic function; RCA=right coronary artery; RLVSF=reduced left ventricular systolic function; SCR=successful CTO revascularization
